# Supplementary material for: Perfluorinated compounds in delivering women from south central Vietnam
Source: Royal Society of Chemistry journal article supplement (doi:10.1039/b908551c), 2009-01-01

## Supplementary information for

### “Perfluorinated compounds in delivering women from south central Vietnam”

Charlotta Rylander<sup>1,2</sup>, Duong Trong Phi<sup>3</sup>, Jon Øyvind Odland<sup>1</sup>, Torkjel M Sandanger<sup>1,2</sup>

1. Institute of Community Medicine, University of Tromsø, 9037 Tromsø, Norway

2. Norwegian Institute for Air Research, the Polarenvironmental Centre, 9296 Tromsø, Norway

3. Department of Environment and School Health, Nha Trang Pasteur Institute, Nha Trang, Vietnam

**Table 1.** Target analytes and native analytical standards, their abbreviation, exact quantification mass and cone voltages

| Compound                                                | Abbreviation  | Quantification mass (m/z)<br>(Cone voltage (V)) |
|---------------------------------------------------------|---------------|-------------------------------------------------|
| 3,5-Bis(trifluoromethyl)phenyl acetic acid <sup>1</sup> | BTPA          | 227.03 (35)                                     |
| Mass labelled Perfluorooctanoate <sup>2</sup>           | 13 C-PFOA     | 372.98 (35)                                     |
| Mass labelled Perfluorooctane sulfonate <sup>2</sup>    | 13C-PFOS      | 502.93 (50)                                     |
| Perfluorooctanesulfonic acid <sup>3</sup>               | PFOSA         | 497.95 (35)                                     |
| Perfluorohexane sulfonate <sup>3</sup>                  | PFHxS         | 398.94 (50)                                     |
| Perfluoroheptane sulfonate <sup>3</sup>                 | PFHpS         | 449.12 (50)                                     |
| Perfluorooctane sulfonate branched isomers              | PFOS branched | 498.93 (50)                                     |
| Perfluorooctane sulfonate linear isomer <sup>3</sup>    | PFOS linear   | 498.93 (50)                                     |
| Perfluoroheptanoate <sup>3</sup>                        | PFHpA         | 318.98 (35)                                     |
| Perfluorooctanoate <sup>3</sup>                         | PFOA          | 368.98 (35)                                     |
| Perfluorononanoate <sup>3</sup>                         | PFNA          | 418.97 (35)                                     |

1. Used as recovery standard. 2. Used as internal standard. 3. Native standard.

**Figure 1.** Chromatogram of branched (RT7.48) and linear isomers (RT 7.67) of PFOS.

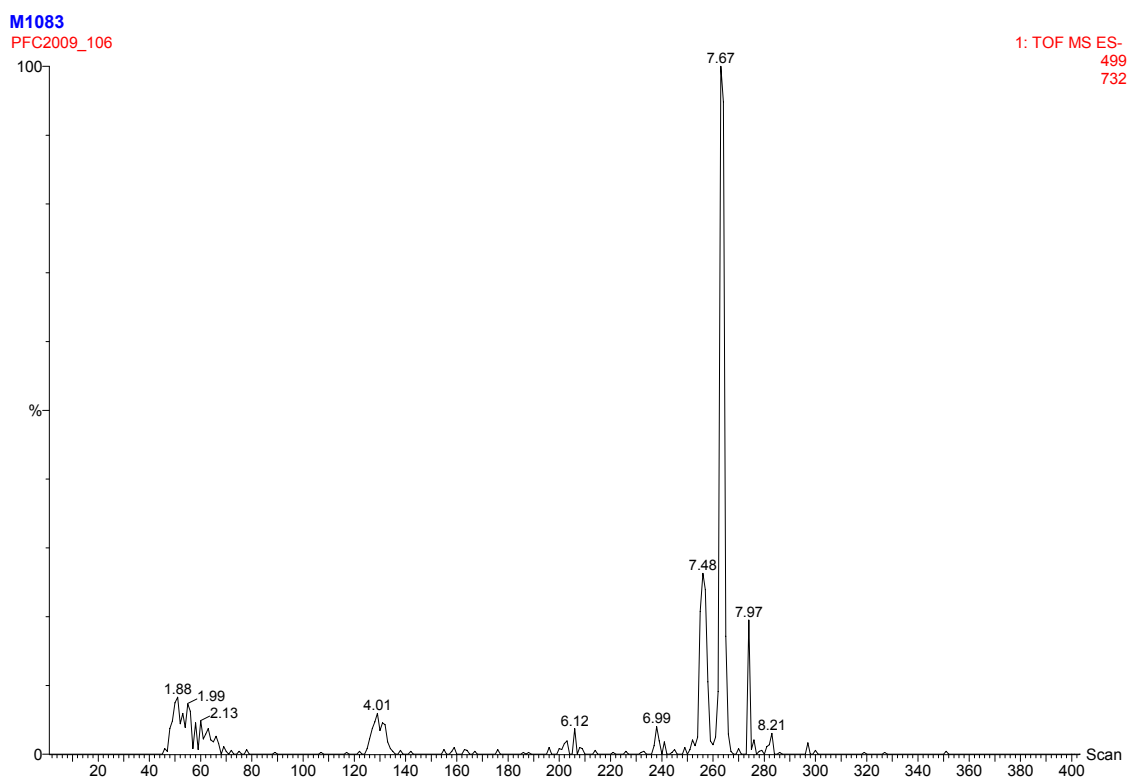

Supplement: b908551c.pdf [file b908551c.pdf]
